# Supplementary material for: Improvement in the Sustained-Release Performance of Electrospun Zein Nanofibers via Crosslinking Using Glutaraldehyde Vapors
Source: MDPI journal article supplement (doi:10.3390/foods13101583), 2024-05-20
Supplement: s1 [file s1]

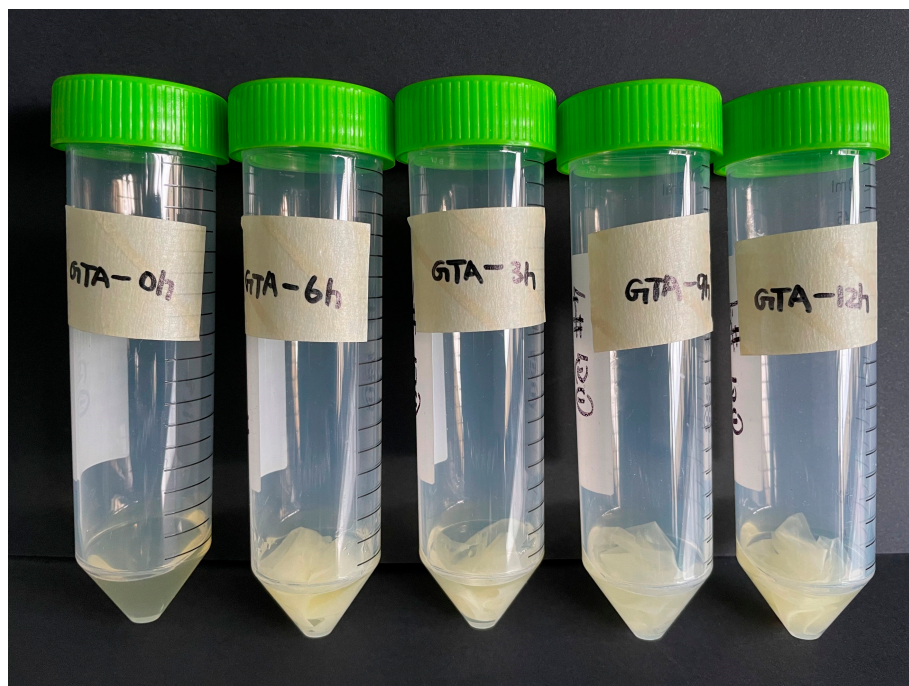

**Figure S1.** Macroscopic images of as-spun and crosslinked zein nanofibers exposed to acetic acid for 24 h.

**Table S1.** Average fiber diameters and standard deviation of non-crosslinked and GTA crosslinked zein nanofibers.

| Samples | Average fiber diameters (nm) | standard deviation |
|---------|------------------------------|--------------------|
| GTA_0h  | 208.22                       | 46.93              |
| GTA_3h  | 225.52                       | 47.25              |
| GTA_6h  | 224.32                       | 52.93              |
| GTA_9h  | 226.96                       | 68.00              |
| GTA_12h | 267.69                       | 90.97              |

**Table S2.** Functional groups and structural changes in the as-spun and crosslinked zein nanofibers [41].

| Characteristic peaks | Functional groups                                | Samples               |                       |                       |                       |                       |
|----------------------|--------------------------------------------------|-----------------------|-----------------------|-----------------------|-----------------------|-----------------------|
|                      |                                                  | GTA_0h                | GTA_3h                | GTA_6h                | GTA_9h                | GTA_12h               |
| 1                    | N-H and O-H stretching vibration (Amide A)       | 3295 cm <sup>-1</sup> | 3292 cm <sup>-1</sup> | 3292 cm <sup>-1</sup> | 3276 cm <sup>-1</sup> | 3275 cm <sup>-1</sup> |
| 3                    | C=O stretching vibration (Amide I)               | 1653 cm <sup>-1</sup> | 1653 cm <sup>-1</sup> | 1652 cm <sup>-1</sup> | 1648 cm <sup>-1</sup> | 1648 cm <sup>-1</sup> |
| 4                    | N-H bending vibration (Amide II)                 | 1542 cm <sup>-1</sup> |
| 5                    | symmetric stretching vibration of the C=O groups | -                     | 1077 cm <sup>-1</sup> | 1066 cm <sup>-1</sup> | 1066 cm <sup>-1</sup> | 1066 cm <sup>-1</sup> |
